# Supplementary material for: Design of three-component randomly incorporated copolymers as non-fullerene acceptors for all-polymer solar cells
Source: Royal Society of Chemistry journal article supplement (doi:10.1039/c6py00093b), 2016-01-01
Supplement: c6py00093b1.pdf [file c6py00093b1.pdf]

## Design of Three-Component Randomly Incorporated Copolymers as Non-Fullerene Acceptors for All-Polymer Solar Cells

Xiangzhi Li,<sup>a,b</sup> Po Sun,<sup>a,b</sup> Yulong Wang,<sup>b</sup> Haiquan Shan,<sup>b</sup> Jiaju Xu,<sup>b</sup> Cong You,<sup>a</sup> Zong-xiang Xu<sup>\*b</sup> and Zhi-Kuan Chen<sup>\*a</sup>

<sup>a</sup> Key Laboratory of Flexible Electronics (KLOFE) & Institute of Advanced Materials (IAM), National Jiangsu Synergetic Innovation Center for Advanced Materials, Nanjing Tech University, 30 South Puzhu Road, Nanjing 211816, China.

<sup>b</sup> Department of Chemistry, South University of Science and Technology of China, Shenzhen, P. R. China

Email: iamzkchen@njtech.edu.cn; [xuzx@sustc.edu.cn](mailto:xuzx@sustc.edu.cn)

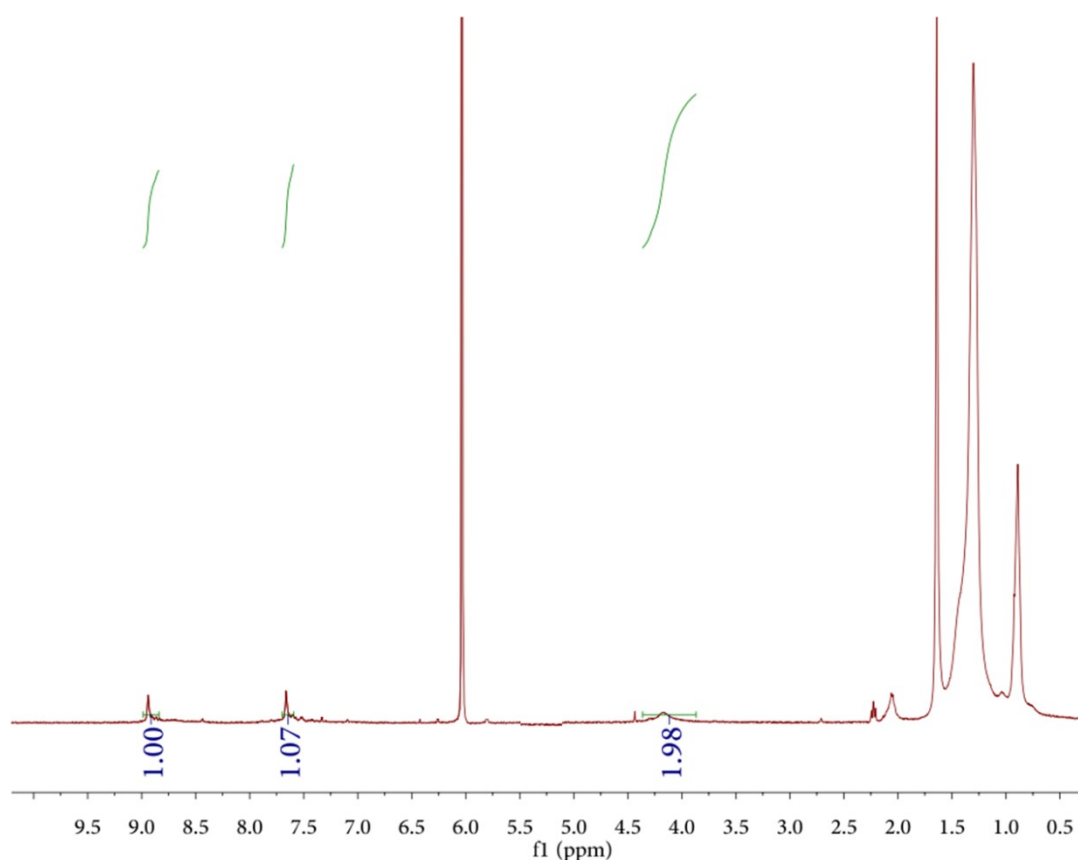

<sup>1</sup>H NMR spectrum of copolymer 1

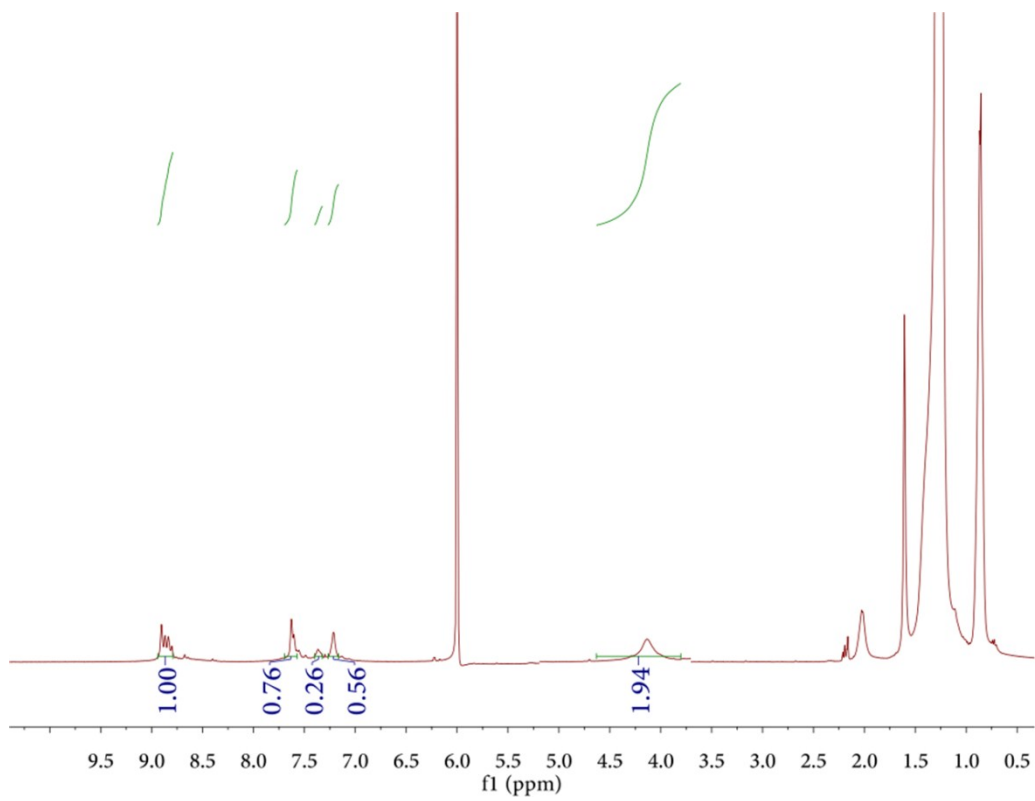

<sup>1</sup>H NMR spectrum of copolymer 2

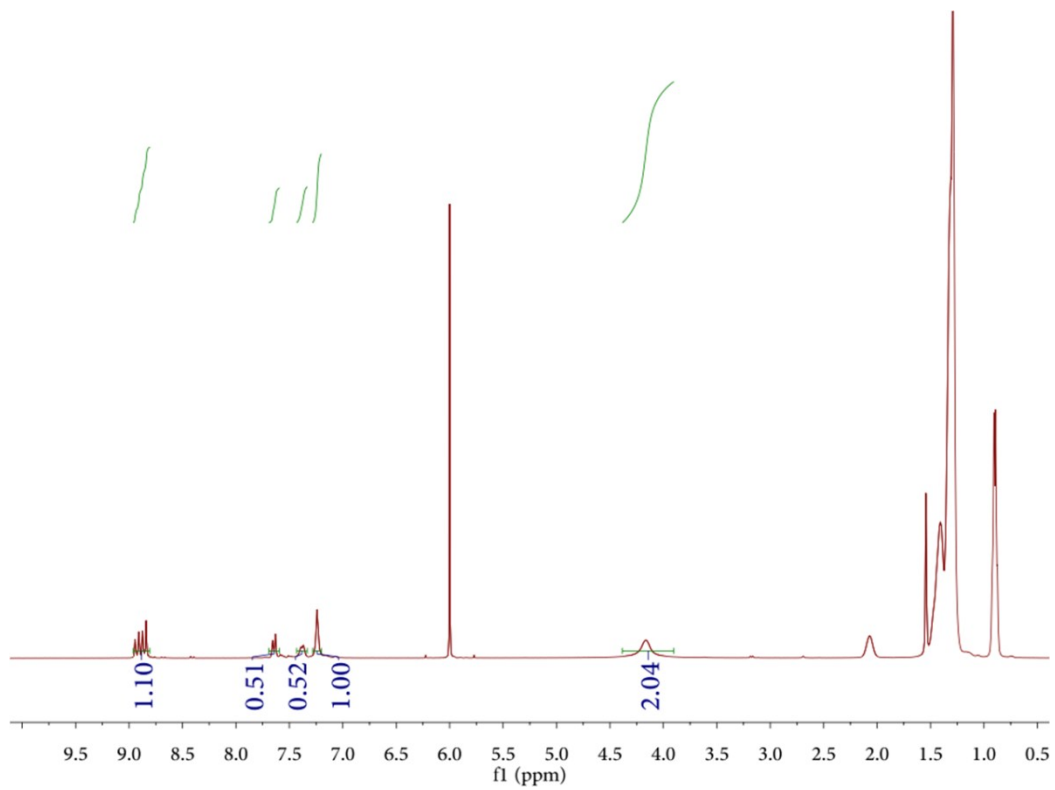

<sup>1</sup>H NMR spectrum of copolymer 3

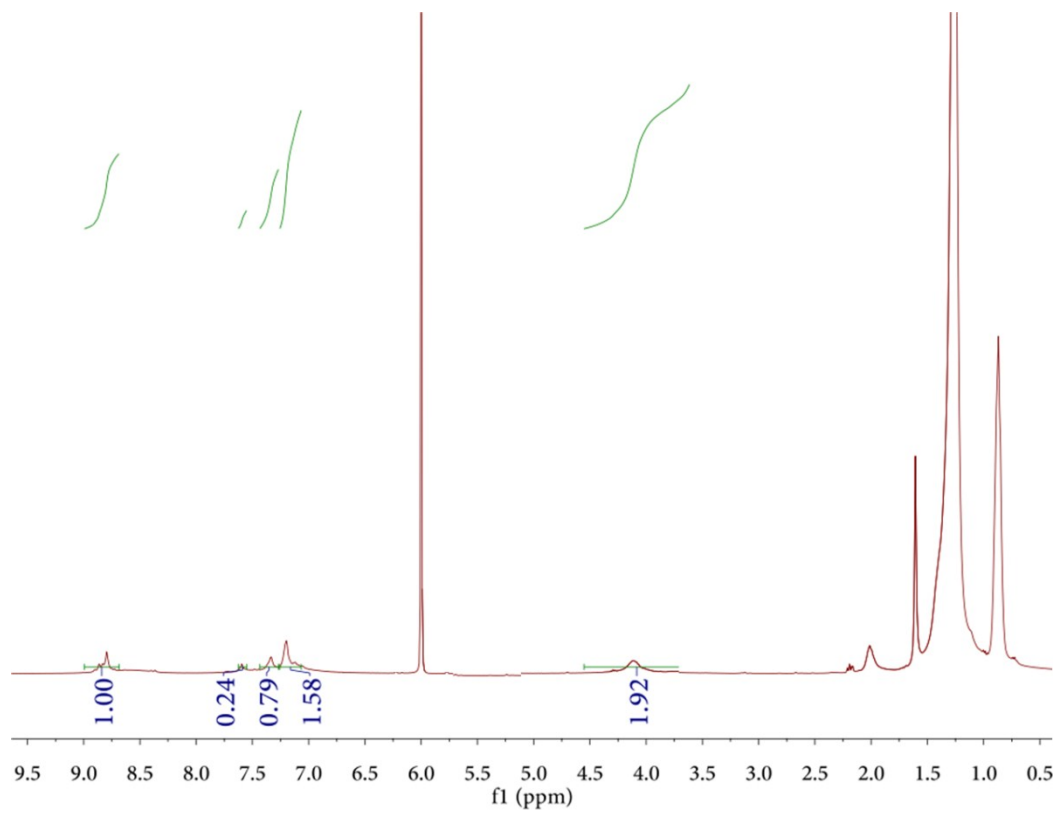

<sup>1</sup>H NMR spectrum of copolymer 4

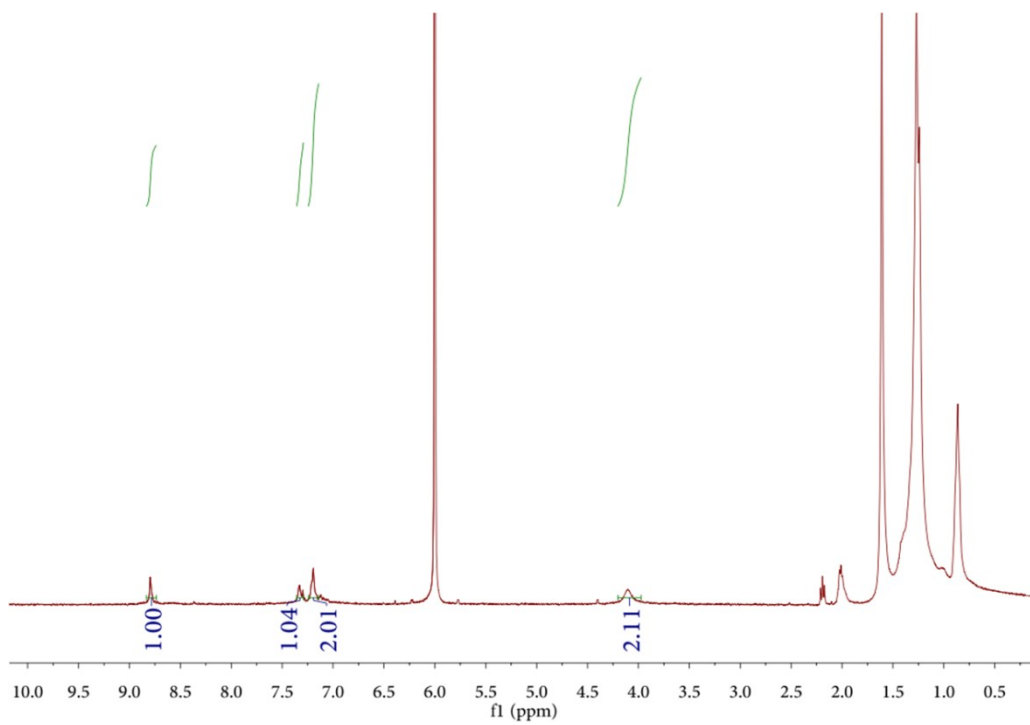

<sup>1</sup>H NMR spectrum of copolymer 5

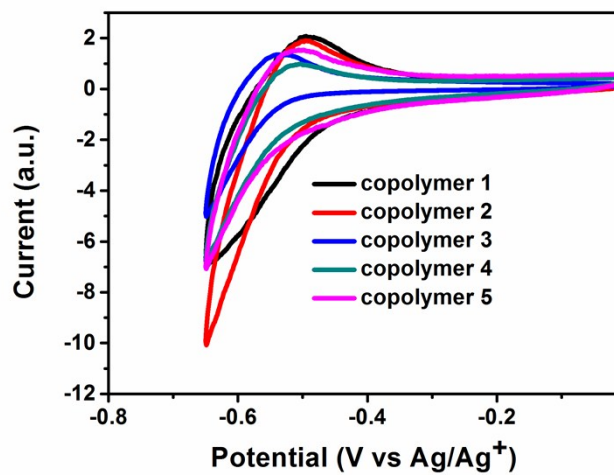

Figure S1. Cyclic voltammometry spectra of five copolymers.

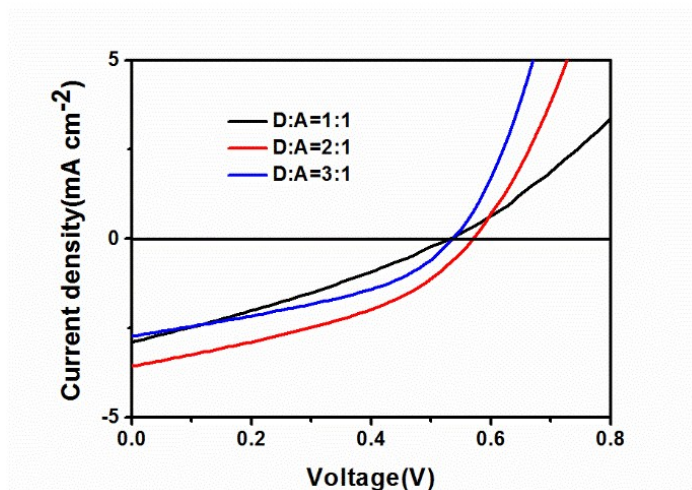

Figure S2. J-V curves of PTB7-Th:Copolymer 1 blend with different weight ratio.

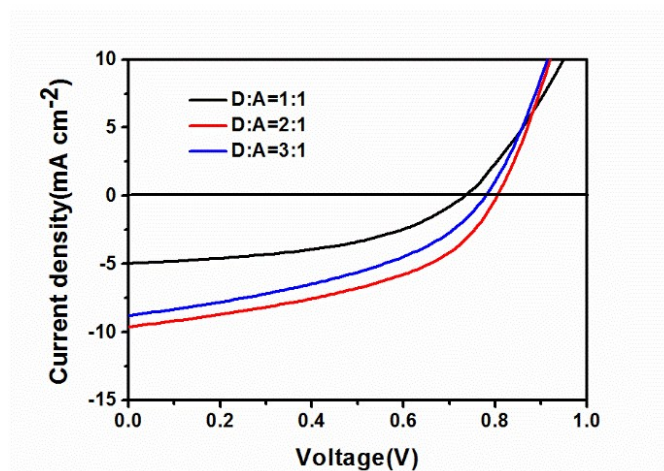

Figure S3. J-V curves of PTB7-Th:Copolymer 2 blend with different weight ratio.

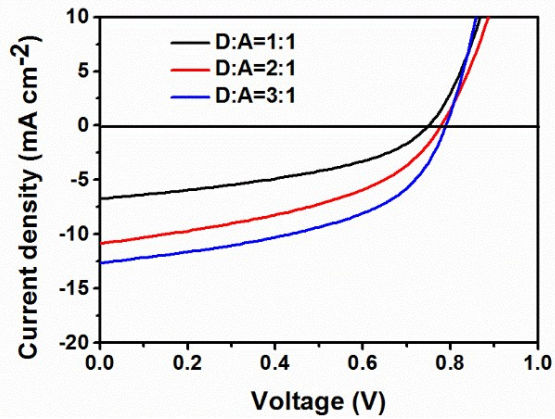

Figure S4. J-V curves of PTB7-Th:Copolymer 3 blend with different weight ratio.

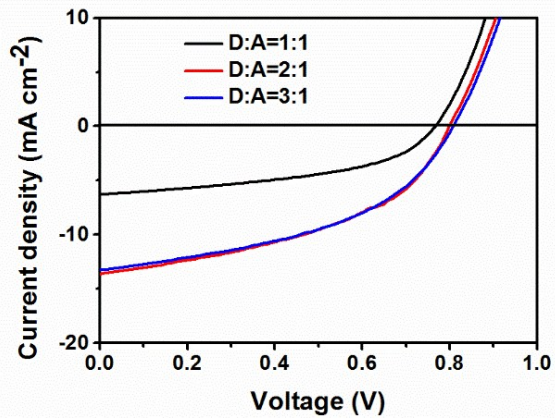

Figure S5. J-V curves of PTB7-Th:Copolymer 4 blend with different weight ratio.

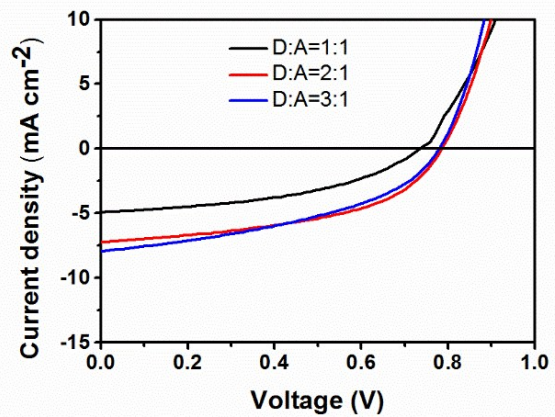

Figure S6. J-V curves of PTB7-Th:Copolymer 5 blend with different weight ratio.

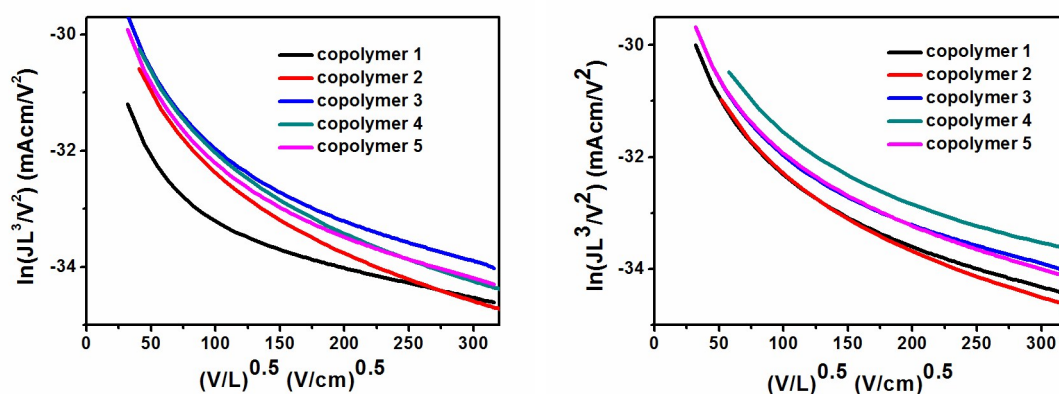

Figure S7. Space-charge-limited current (SCLC) fittings of devices: Hole-only SCLC devices (left): ITO/PEDOT:PSS/blend/MoO<sub>x</sub>/Al and electron-only devices (right) with the structure of ITO/ZnO/blend/Ca/Al.

Table S1 Photovoltaic performance of PTB7-Th:Copolymer 1 blend with different weight ratio.

| D/A (w/w) | V <sub>oc</sub> [V] | J <sub>sc</sub> [mA cm <sup>-2</sup> ] | FF    | PCE <sup>a</sup> (%) |
|-----------|---------------------|----------------------------------------|-------|----------------------|
| 1:1       | 0.612               | 2.72                                   | 0.329 | 0.55 (0.50±0.05)     |
| 2:1       | 0.570               | 3.56                                   | 0.391 | 0.79 (0.65±0.14)     |
| 3:1       | 0.472               | 2.20                                   | 0.357 | 0.37 (0.31±0.06)     |

<sup>a</sup>Average PCE in brackets

Table S2 Photovoltaic performance of PTB7-Th:Copolymer 2 blend with different weight ratio.

| D/A (w/w) | V <sub>oc</sub> [V] | J <sub>sc</sub> [mA cm <sup>-2</sup> ] | FF    | PCE <sup>a</sup> (%) |
|-----------|---------------------|----------------------------------------|-------|----------------------|
| 1:1       | 0.750               | 513                                    | 0.495 | 1.90 (1.81±0.06)     |
| 2:1       | 0.805               | 9.60                                   | 0.451 | 3.48 (3.41±0.07)     |
| 3:1       | 0.779               | 8.79                                   | 0.409 | 2.48 (2.40±0.08)     |

<sup>a</sup>Average PCE in brackets

Table S3 Photovoltaic performance of PTB7-Th:Copolymer 3 blend with different weight ratio.

| D/A (w/w) | V <sub>oc</sub> [V] | J <sub>sc</sub> [mA cm <sup>-2</sup> ] | FF    | PCE <sup>a</sup> (%) |
|-----------|---------------------|----------------------------------------|-------|----------------------|
| 1:1       | 0.741               | 6.06                                   | 0.455 | 2.05 (1.97±0.08)     |
| 2:1       | 0.779               | 10.86                                  | 0.431 | 3.65 (3.56±0.09)     |
| 3:1       | 0.790               | 12.66                                  | 0.486 | 4.86 (4.8±0.06)      |

<sup>a</sup>Average PCE in brackets

Table S4 Photovoltaic performance of PTB7-Th:Copolymer 4 blend with different weight ratio.

| D/A (w/w) | V <sub>oc</sub> [V] | J <sub>sc</sub> [mA cm <sup>-2</sup> ] | FF    | PCE <sup>a</sup> (%) |
|-----------|---------------------|----------------------------------------|-------|----------------------|
| 1:1       | 0.767               | 6.30                                   | 0.467 | 2.26 (2.14±0.12)     |
| 2:1       | 0.794               | 13.75                                  | 0.483 | 5.27 (5.14±0.13)     |
| 3:1       | 0.798               | 13.26                                  | 0.466 | 4.94 (4.87±0.07)     |

<sup>a</sup>Average PCE in brackets

Table S5 Photovoltaic performance of PTB7-Th:Copolymer 5 blend with different weight ratio.

| D/A (w/w) | V <sub>oc</sub> [V] | J <sub>sc</sub> [mA cm <sup>-2</sup> ] | FF    | PCE <sup>a</sup> (%) |
|-----------|---------------------|----------------------------------------|-------|----------------------|
| 1:1       | 0.744               | 5.02                                   | 0.476 | 1.78 (1.70±0.08)     |
| 2:1       | 0.795               | 7.41                                   | 0.499 | 2.94 (2.75±0.19)     |
| 3:1       | 0.778               | 8.04                                   | 0.424 | 2.65 (2.61±0.04)     |

<sup>a</sup>Average PCE in brackets
